# Supplementary material
Source: PubMed Central journal article supplement (PMC3321808)

**Supplemental Table 1:** Top 100 differentially expressed genes based on p value and direct comparison of gene expression across the four developmental age groups.

| ID           | P value  | Common Name | Genbank   | Description                                                  |
|--------------|----------|-------------|-----------|--------------------------------------------------------------|
| 41469_at     | 1.23E-14 | PI3         | L10343    | peptidase inhibitor 3, skin-derived (SKALP)                  |
| 227250_at    | 1.72E-14 | KREMEN1     | BF221745  | kringle containing transmembrane protein 1                   |
| 219295_s_at  | 2.29E-13 | PCOLCE2     | NM_013363 | procollagen C-endopeptidase enhancer 2                       |
| 222073_at    | 2.14E-11 | COL4A3      | AI694562  | collagen, type IV, alpha 3                                   |
| 210483_at    | 3.25E-11 | TNFRSF10C   | BC005043  | tumor necrosis factor receptor superfamily, member 10c       |
| 238058_at    | 4.15E-11 | FLJ27365    | AA603041  | FLJ27365 protein /// hypothetical protein LOC150381          |
| 1554997_a_at | 4.33E-11 | PTGS2       | AY151286  | prostaglandin-endoperoxide synthase 2                        |
| 225669_at    | 6.56E-11 | IFNAR1      | AA133989  | interferon (alpha, beta and omega) receptor 1                |
| 242230_at    | 1.17E-10 | ATXN1       | BF438383  | ataxin 1                                                     |
| 228490_at    | 3.64E-10 | ABHD2       | AW292816  | abhydrolase domain containing 2                              |
| 227150_at    | 3.64E-10 | MTF1        | N46867    | metal-regulatory transcription factor 1                      |
| 206546_at    | 6.56E-10 | SYCP2       | NM_014258 | synaptonemal complex protein 2                               |
| 234299_s_at  | 6.68E-10 | NIN         | AK027054  | ninein (GSK3B interacting protein)                           |
| 217078_s_at  | 2.29E-09 | CD300A      | AJ010102  | CD300a molecule                                              |
| 202912_at    | 2.90E-09 | ADM         | NM_001124 | Adrenomedullin                                               |
| 213173_at    | 3.58E-09 | PCNX        | AI815033  | pecanex homolog (Drosophila)                                 |
| 203042_at    | 5.27E-09 | LAMP2       | NM_002294 | lysosomal-associated membrane protein 2                      |
| 206765_at    | 5.84E-09 | KCNJ2       | AF153820  | potassium inwardly-rectifying channel, subfamily J, member 2 |
| 208690_s_at  | 6.16E-09 | PDLIM1      | BC000915  | PDZ and LIM domain 1                                         |
| 222662_at    | 6.29E-09 | PPP1R3B     | W60806    | protein phosphatase 1, regulatory (inhibitor) subunit 3B     |
| 244313_at    | 7.05E-09 | CR1         | AI052659  | complement component (3b/4b) receptor 1                      |
| 39402_at     | 7.05E-09 | IL1B        | M15330    | interleukin 1, beta                                          |
| 1565544_at   | 7.05E-09 | RNF141      | AI758773  | ring finger protein 141                                      |
| 64883_at     | 7.28E-09 | MOSPD2      | AI744083  | motile sperm domain containing 2                             |
| 202530_at    | 7.52E-09 | MAPK14      | NM_001315 | mitogen-activated protein kinase 14                          |
| 222447_at    | 8.03E-09 | METTL9      | BC000195  | methyltransferase like 9                                     |
| 227654_at    | 1.43E-08 | FAM65C      | AI056877  | family with sequence similarity 65, member C                 |
| 228188_at    | 1.45E-08 | FOSL2       | AI860150  | FOS-like antigen 2                                           |
| 225941_at    | 1.61E-08 | EIF4E3      | AI935522  | eukaryotic translation initiation factor 4E family member 3  |
| 222693_at    | 1.61E-08 | FNDC3B      | BF444916  | fibronectin type III domain containing 3B                    |
| 200984_s_at  | 1.63E-08 | CD59        | X16447    | CD59 molecule, complement regulatory protein                 |
| 202625_at    | 2.05E-08 | LYN         | AI356412  | v-yes-1 Yamaguchi sarcoma viral related oncogene homolog     |
| 244578_at    | 2.32E-08 | LCP2        | AA992040  | lymphocyte cytosolic protein 2                               |
| 231029_at    | 2.91E-08 | F5          | AI740541  | coagulation factor V (proaccelerin, labile factor)           |
| 1556228_a_at | 2.97E-08 | VCPIP1      | AF088033  | valosin containing protein (p97)                             |
| 239598_s_at  | 3.06E-08 | LPCAT2      | AA789296  | lysophosphatidylcholine acyltransferase 2                    |
| 221497_x_at  | 3.13E-08 | EGLN1       | BC005369  | egl nine homolog 1 (C. elegans)                              |
| 204493_at    | 3.16E-08 | BID         | NM_001196 | BH3 interacting domain death agonist                         |

|             |          |              |           |                                                                                                |
|-------------|----------|--------------|-----------|------------------------------------------------------------------------------------------------|
| 200704_at   | 4.03E-08 | LITAF        | AB034747  | lipopolysaccharide-induced TNF factor                                                          |
| 210582_s_at | 4.45E-08 | LIMK2        | AL117466  | LIM domain kinase 2                                                                            |
| 207500_at   | 5.26E-08 | CASP5        | NM_004347 | caspase 5, apoptosis-related cysteine peptidase                                                |
| 203820_s_at | 5.37E-08 | IGF2BP3      | NM_006547 | insulin-like growth factor 2 mRNA binding protein 3                                            |
| 202181_at   | 5.60E-08 | KIAA0247     | NM_014734 | KIAA0247                                                                                       |
| 218310_at   | 5.70E-08 | RABGEF1      | NM_014504 | RAB guanine nucleotide exchange factor (GEF) 1                                                 |
| 212602_at   | 5.70E-08 | WDFY3        | AI806395  | WD repeat and FYVE domain containing 3                                                         |
| 230999_at   | 6.02E-08 | FLJ39051     | AI743903  | Hypothetical gene supported by AK096370                                                        |
| 201631_s_at | 6.02E-08 | IER3         | NM_003897 | immediate early response 3                                                                     |
| 238725_at   | 6.02E-08 | IRF1         | AW392551  | interferon regulatory factor 1                                                                 |
| 204307_at   | 6.02E-08 | KIAA0329     | AB002295  | KIAA0329                                                                                       |
| 241620_at   | 6.02E-08 | SMCHD1       | AA873021  | structural maintenance of chromosomes flexible hinge domain containing 1                       |
| 216841_s_at | 6.02E-08 | SOD2         | X15132    | superoxide dismutase 2, mitochondrial                                                          |
| 1570135_at  | 6.02E-08 | ZNF230       | BC030810  | Zinc finger protein 230                                                                        |
| 202200_s_at | 6.40E-08 | SRPK1        | NM_003137 | SFRS protein kinase 1                                                                          |
| 203397_s_at | 6.50E-08 | GALNT3       | BF063271  | UDP-N-acetyl-alpha-D-galactosamine:polypeptide N-acetylgalactosaminyltransferase 3 (GalNAc-T3) |
| 204554_at   | 6.60E-08 | PPP1R3D      | AL109928  | protein phosphatase 1, regulatory (inhibitor) subunit 3D                                       |
| 230364_at   | 6.68E-08 | CHPT1        | BF940025  | choline phosphotransferase 1                                                                   |
| 212335_at   | 7.27E-08 | GNS          | AW167793  | glucosamine (N-acetyl)-6-sulfatase                                                             |
| 207446_at   | 7.81E-08 | TLR6         | NM_006068 | toll-like receptor 6                                                                           |
| 207907_at   | 8.24E-08 | TNFSF14      | NM_003807 | tumor necrosis factor (ligand) superfamily, member 14                                          |
| 209448_at   | 8.88E-08 | HTATIP2      | BC002439  | HIV-1 Tat interactive protein 2, 30kDa                                                         |
| 217738_at   | 9.77E-08 | NAMPT        | BF575514  | nicotinamide phosphoribosyltransferase                                                         |
| 211306_s_at | 1.13E-07 | FCAR         | U56237    | Fc fragment of IgA, receptor for                                                               |
| 203574_at   | 1.13E-07 | NFIL3        | NM_005384 | nuclear factor, interleukin 3 regulated                                                        |
| 216316_x_at | 1.21E-07 | GK3P /// GK  | X78713    | glycerol kinase /// glycerol kinase 3 pseudogene                                               |
| 222642_s_at | 1.24E-07 | TMEM33       | BC000948  | transmembrane protein 33                                                                       |
| 1557418_at  | 1.26E-07 | ACSL4        | W95007    | Acyl-CoA synthetase long-chain family member 4                                                 |
| 209840_s_at | 1.26E-07 | LRRN3        | AI221950  | leucine rich repeat neuronal 3                                                                 |
| 336_at      | 1.34E-07 | TBXA2R       | D38081    | thromboxane A2 receptor                                                                        |
| 202897_at   | 1.35E-07 | SIRPA        | AB023430  | signal-regulatory protein alpha                                                                |
| 229699_at   | 1.37E-07 | LOC100129550 | AW237752  | hypothetical protein LOC100129550                                                              |
| 1554730_at  | 1.40E-07 | MCTP1        | BC030005  | multiple C2 domains, transmembrane 1                                                           |
| 210119_at   | 1.51E-07 | KCNJ15       | U73191    | potassium inwardly-rectifying channel, subfamily J, member 15                                  |
| 225878_at   | 1.55E-07 | KIF1B        | AL135264  | kinesin family member 1B                                                                       |
| 220603_s_at | 1.72E-07 | MCTP2        | NM_018349 | multiple C2 domains, transmembrane 2                                                           |
| 229285_at   | 1.89E-07 | RNASEL       | AI669749  | ribonuclease L (2',5'-oligoadenylate synthetase-dependent)                                     |
| 209238_at   | 1.92E-07 | STX3         | BE966922  | syntaxin 3                                                                                     |
| 225183_at   | 2.08E-07 | C16orf72     | BG495327  | chromosome 16 open reading frame 72                                                            |
| 210176_at   | 2.14E-07 | TLR1         | AL050262  | toll-like receptor 1                                                                           |

|             |          |               |           |                                                              |
|-------------|----------|---------------|-----------|--------------------------------------------------------------|
| 223451_s_at | 2.24E-07 | CKLF          | AF096895  | chemokine-like factor                                        |
| 1553920_at  | 2.25E-07 | C9orf84       | NM_173521 | chromosome 9 open reading frame 84                           |
| 224917_at   | 2.25E-07 | MIR21         | BF674052  | microRNA 21                                                  |
| 224148_at   | 2.43E-07 | FYB           | AF116653  | FYN binding protein (FYB-120/130)                            |
| 1554638_at  | 2.44E-07 | ZFYVE16       | BC032227  | zinc finger, FYVE domain containing 16                       |
| 213341_at   | 2.48E-07 | FEM1C         | AI862658  | fem-1 homolog c (C. elegans)                                 |
| 212864_at   | 2.53E-07 | CDS2          | Y16521    | CDP-diacylglycerol synthase                                  |
| 203373_at   | 2.53E-07 | SOCS2         | NM_003877 | suppressor of cytokine signaling 2                           |
| 229743_at   | 2.53E-07 | ZNF438        | AI886666  | zinc finger protein 438                                      |
| 231886_at   | 2.70E-07 | DKFZP434B2016 | AL137655  | similar to hypothetical protein LOC284701                    |
| 206026_s_at | 3.06E-07 | TNFAIP6       | NM_007115 | tumor necrosis factor, alpha-induced protein 6               |
| 228846_at   | 3.12E-07 | MXD1          | AW071793  | MAX dimerization protein 1                                   |
| 217986_s_at | 3.77E-07 | BAZ1A         | NM_013448 | bromodomain adjacent to zinc finger domain, 1A               |
| 210756_s_at | 4.14E-07 | NOTCH2        | AF308601  | Notch homolog 2 (Drosophila)                                 |
| 219033_at   | 4.46E-07 | PARP8         | NM_024615 | poly (ADP-ribose) polymerase family, member 8                |
| 208499_s_at | 4.85E-07 | DNAJC3        | NM_006260 | DnaJ (Hsp40) homolog, subfamily C, member 3                  |
| 230972_at   | 4.94E-07 | ANKRD9        | AW194999  | ankyrin repeat domain 9                                      |
| 203044_at   | 5.09E-07 | CHSY1         | NM_014918 | chondroitin sulfate synthase 1                               |
| 236013_at   | 5.47E-07 | CACNA1E       | AW452628  | calcium channel, voltage-dependent, R type, alpha 1E subunit |
| 217967_s_at | 6.02E-07 | FAM129A       | AF288391  | family with sequence similarity 129, member A                |

**Supplemental Table 2:** Eleven gene probes differentially regulated between patients with gram positive infection and patients with gram negative infection.

| <b>Affymetrix ID</b> | <b>Gene Symbol</b> | <b>Genbank</b> | <b>Description</b>                                        |
|----------------------|--------------------|----------------|-----------------------------------------------------------|
| 213348_at            | CDKN1C             | N33167         | cyclin-dependent kinase inhibitor 1C (p57, Kip2)          |
| 206676_at            | CEACAM8            | M33326         | carcinoembryonic antigen-related cell adhesion molecule 8 |
| 218542_at            | CEP55              | NM_018131      | centrosomal protein 55kDa                                 |
| 205220_at            | GPR109B            | NM_006018      | G protein-coupled receptor 109B                           |
| 218963_s_at          | KRT23              | NM_015515      | keratin 23 (histone deacetylase inducible)                |
| 231688_at            | MMP8               | AW337833       | matrix metalloproteinase 8 (neutrophil collagenase)       |
| 207329_at            | MMP8               | NM_002424      | matrix metalloproteinase 8 (neutrophil collagenase)       |
| 41469_at             | PI3                | L10343         | peptidase inhibitor 3, skin-derived (SKALP)               |
| 203691_at            | PI3                | NM_002638      | peptidase inhibitor 3, skin-derived (SKALP)               |
| 201110_s_at          | THBS1              | NM_003246      | thrombospondin 1                                          |
| 234632_x_at          |                    | AK026267       |                                                           |

# Supp Fig 1.

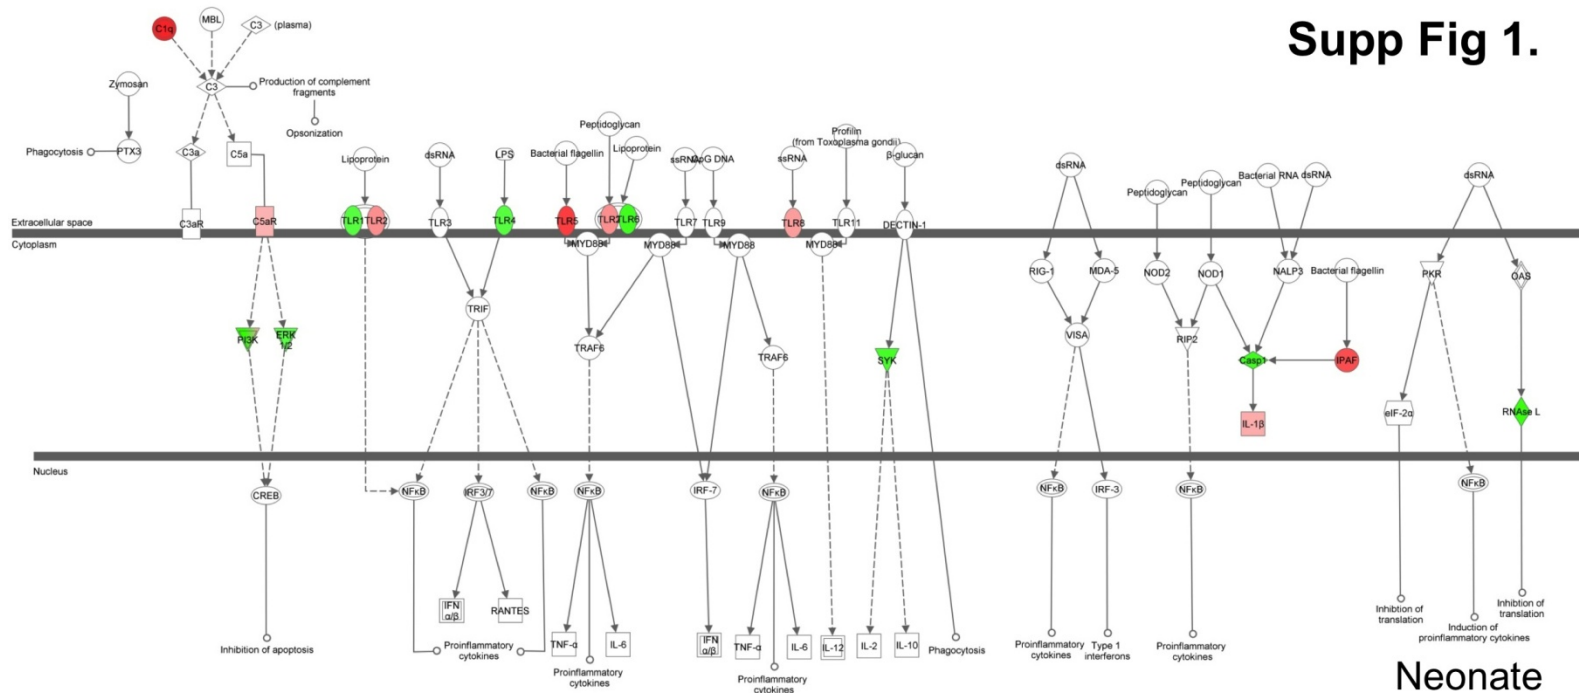

Neonate  
School age

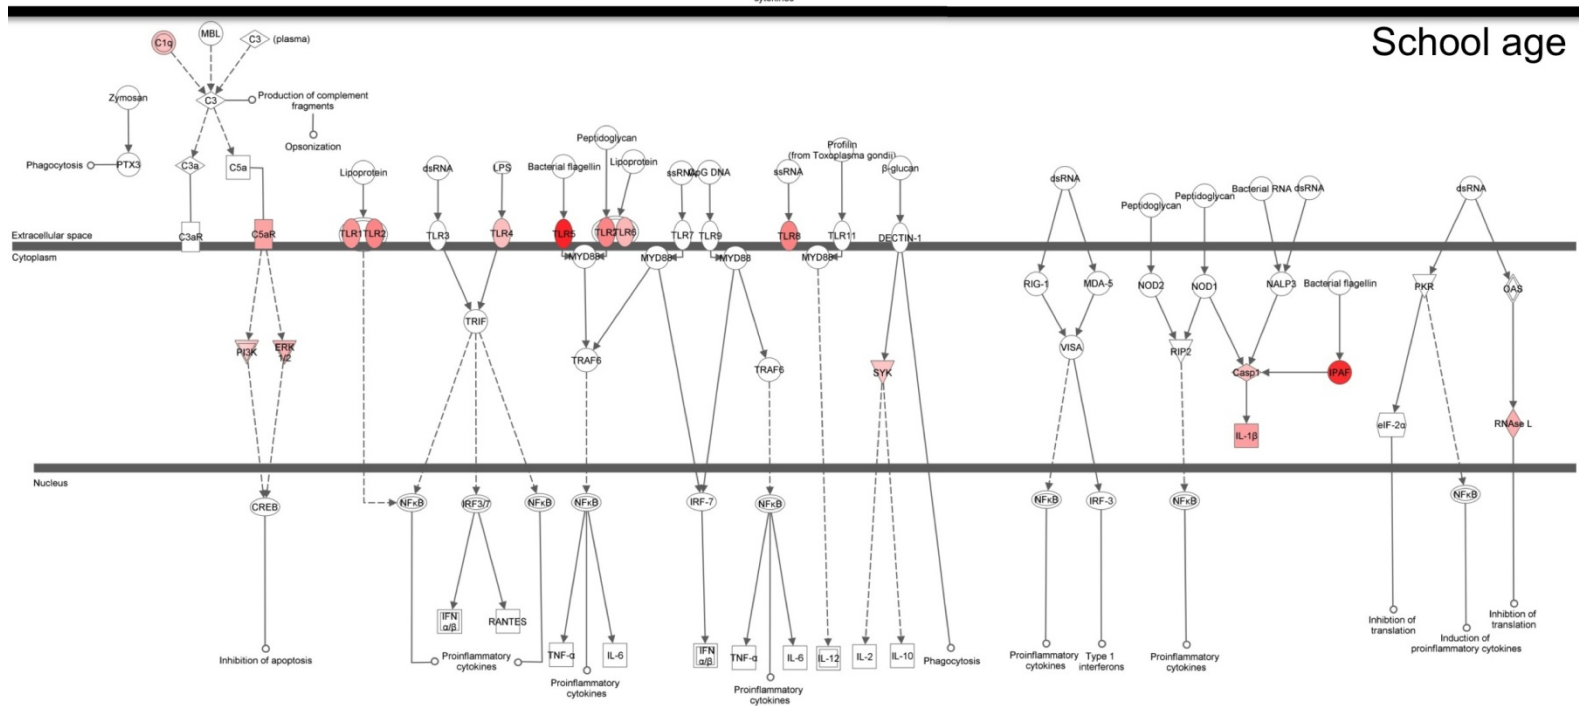

# Supp Fig 2.

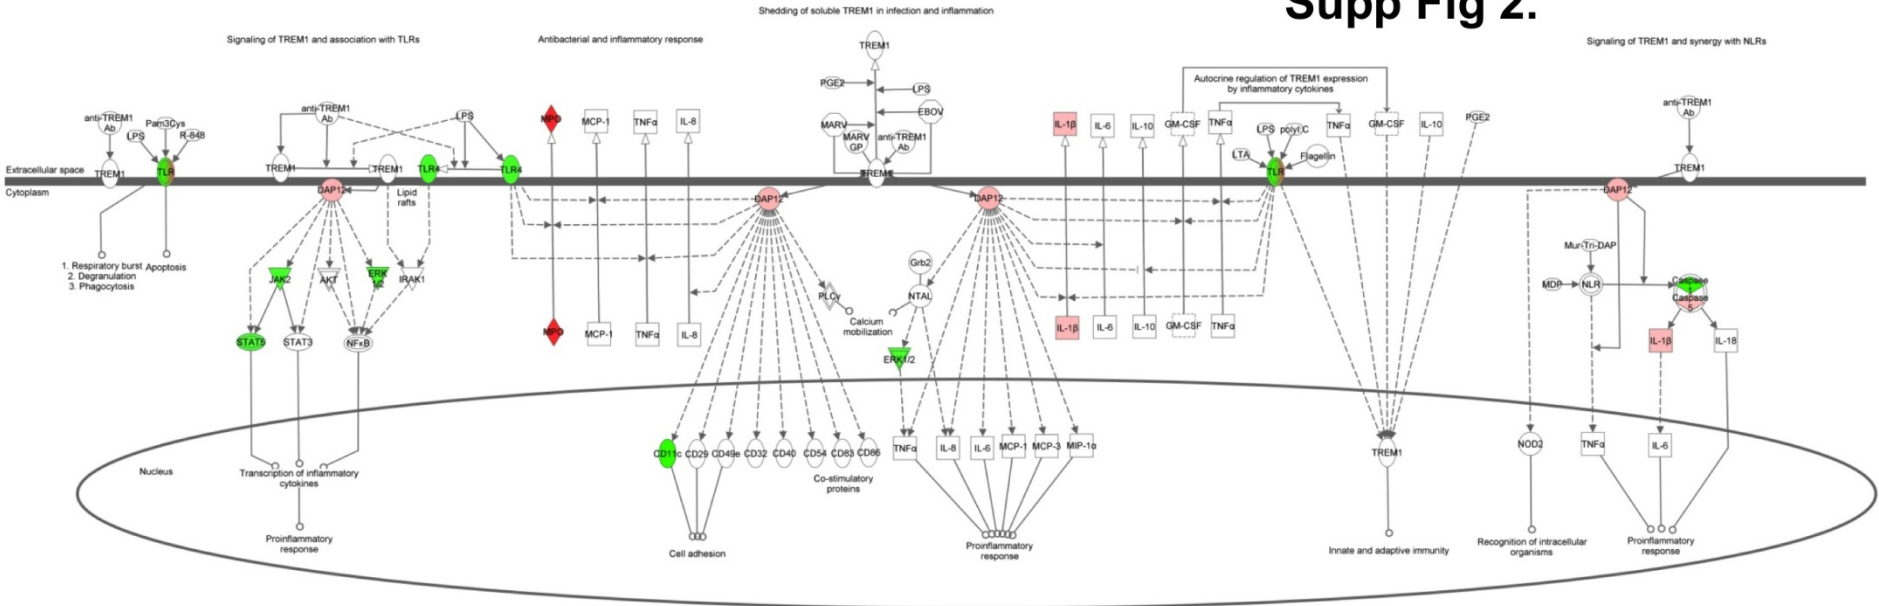

Neonate

School age

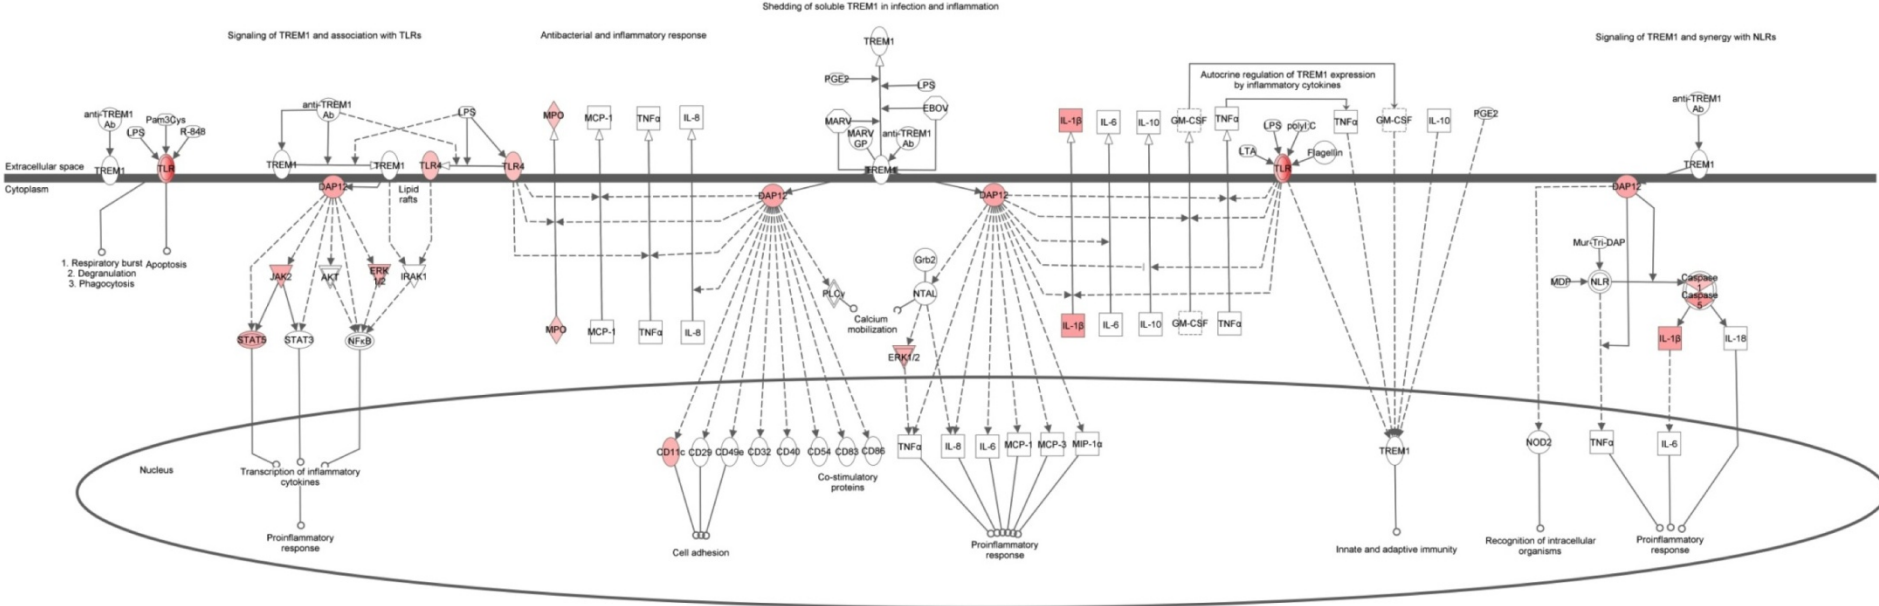

Supplement: 11_169_Wynn_Suppl.pdf [file 11_169_Wynn_Suppl.pdf]
